# Supplementary material for: Herb–drug interactions between the medicinal mushrooms Lingzhi and Yunzhi and cytotoxic anticancer drugs: a systematic review
Source: PubMed Central journal article supplement (PMC7382813; doi:10.1186/s13020-020-00356-4), 2020-07-25
Supplement: 13020_2020_356_MOESM1_ESM.pdf [file 13020_2020_356_MOESM1_ESM.pdf]

## **Additional File 1**

**Table S1**      **Keywords for cytotoxic drugs in the current database search**

**Table S2**      **Characteristics of included studies**

**Table S3**      **Detailed information of the included clinical studies**

**Table S4**      **Detailed information of the included pre-clinical studies**

**Figure S1**      **Distribution of pre-clinical and clinical studies for combination use of cytotoxic drugs with Lingzhi and Yunzhi.**

**Table S1 Keywords for cytotoxic drugs in the current database search**

| <b>Generic Name</b>                      | <b>Brand Name (US, Japan, HK)</b>                                            | <b>Chinese Name<br/>(Chinese Pharmacopoeia 2015)</b> |
|------------------------------------------|------------------------------------------------------------------------------|------------------------------------------------------|
| Asparaginase, crisantaspase              | Leunase, Erwinaze                                                            | 門冬酰胺                                                 |
| Bleomycin                                | Bleocin, Bleoxane                                                            | 博來霉素, 平陽霉素                                           |
| Busulphan, Busulfan                      | Myleran, Busulfex                                                            | 白消安                                                  |
| Calcium Folate, Leucovorin, Folinic acid | Fusilev                                                                      | 阿葉酸鈣, 甲酰四氫葉酸,                                        |
| Capecitabine                             | Xeloda                                                                       | 卡培他濱                                                 |
| Carboplatin                              | Paraplatin                                                                   | 卡鉑                                                   |
| Carmustine                               | BiCNU, Gliadel                                                               | 卡莫司汀                                                 |
| Chlorambucil                             | Leukeran                                                                     | 苯丁酸氮芥                                                |
| Clofarabine                              | Clolar, Evoltra                                                              | 氟法拉濱                                                 |
| Cisplatin                                | Randa, Platinol                                                              | 順鉑                                                   |
| Cyclophosphamide                         | Endoxan, Neosar, Cytosan                                                     | 環磷酰胺                                                 |
| Cytarabine                               | Alexan, Cytosar, Arabitin, Cyclocide, Starasid, Depocyt, Vyxeos              | 阿糖胞苷                                                 |
| Dacarbazine                              | DTI                                                                          | 達卡巴嗪                                                 |
| Daunorubicin                             | Daunoxome, Cerubidin                                                         | 柔紅霉素                                                 |
| Docetaxel                                | Docefref, Taxotere                                                           | 多西他奇, 多西他賽, 多西紫杉醇                                    |
| Doxorubicin                              | Adriacin, Adriamycin                                                         | 多柔比星, 阿霉素                                            |
| Epirubicin                               | Pharmorubicin, Episidan, Farmorubicin, Ellence                               | 表阿霉素, 表柔比星                                           |
| Etoposide                                | Lastet, Sintopozid, Vepesid, Etopophos, Toposar                              | 足葉乙甙, 依托泊苷                                           |
| Fludarabine                              | Fludara, Oforta                                                              | 氟達拉濱                                                 |
| Fluorouracil, 5-FU                       | Adrucil                                                                      | 氟尿嘧啶                                                 |
| Gemcitabine                              | Gemzar, Gitrabin                                                             | 吉西他濱                                                 |
| Hydroxyurea                              | Droxia, Hydrea, Siklos                                                       | 羥基脲                                                  |
| Idarubicin                               | Idamycin, Zavedos                                                            | 伊達比星/去甲氧柔紅黴素                                         |
| Ifosfamide                               | Ifex, Holoxan, Ifomide                                                       | 異環磷酰胺                                                |
| Melphalan                                | Alkeran, Evomela                                                             | 馬法蘭                                                  |
| Mercaptopurine                           | Purinethol, Purixan                                                          | 巯基嘌呤, 巯嘌呤                                            |
| Mesna                                    | Mesnex, Uromitexan                                                           | 美司納                                                  |
| Methotrexate                             | Otrexup, Rasuvo, Xatmep, Rheumatrex, Trexall                                 | 甲氨蝶呤, 氨甲蝶呤, 甲氨喋呤                                     |
| Mitomycin                                | Mytomycin, Mutamycin                                                         | 絲裂霉素                                                 |
| Mitoxantrone                             | Santrone, Novantrone                                                         | 米托蒽醌                                                 |
| Oxaliplatin                              | Eloxatin, Elplat                                                             | 奧沙利鉑                                                 |
| Paclitaxel                               | Abraxane, Taxol, Anzatax, Ebetaxel, Sindaxel                                 | 紫杉醇                                                  |
| Pemetrexed                               | Alimta                                                                       | 培美曲塞                                                 |
| Teniposide                               | Vumon                                                                        | 替尼泊甙                                                 |
| Thioguanine                              | Tioguanine, Tabloid, Lanvis                                                  | 硫鳥嘌呤                                                 |
| Tretinoin                                | Vesanoid                                                                     | 維甲酸                                                  |
| Tegafur-Uracil, Tegafur, Uracil, UFT     | -                                                                            | 替加氟, 尿嘧啶                                             |
| Vinblastine                              | Velban, Velbazine                                                            | 長春城                                                  |
| Vincristine                              | Marqibo, Oncovin, Vincrex, Vincasar, Kyocristine, Vinrasine, Vinca alkaloids | 長春新城                                                 |
| Vinorelbine                              | Navelbine                                                                    | 長春瑞濱                                                 |

**Table S2**      **Characteristics of included studies**

|                                                                             | <b>Lingzhi</b> | <b>Yunzhi</b> |
|-----------------------------------------------------------------------------|----------------|---------------|
| <b>Languages</b>                                                            |                |               |
| Chinese                                                                     | 89 (74.2%)     | 28 (29.8%)    |
| English                                                                     | 29 (24.2%)     | 61 (64.9%)    |
| Japanese                                                                    | 2 (1.67%)      | 5 (5.32%)     |
| <b>Study type*</b>                                                          |                |               |
| Clinical                                                                    | 21 (17.5%)     | 56 (59.6%)    |
| Animal                                                                      | 76 (63.3%)     | 32 (34.0%)    |
| In-vitro                                                                    | 27 (22.5%)     | 10 (10.6%)    |
| <b>Country of origin of clinical studies</b>                                |                |               |
| China                                                                       | 21 (100%)      | 14 (25.0%)    |
| Japanese                                                                    | 0 (0%)         | 42 (75.0%)    |
| <b>Cancer Type in clinical studies*</b>                                     |                |               |
| Lung                                                                        | 17 (81.0%)     | 5 (8.93%)     |
| Colorectal                                                                  | 5 (23.8%)      | 14 (25.0%)    |
| Gastric                                                                     | 4 (19.0%)      | 24 (42.9%)    |
| Cervical                                                                    | 3 (14.3%)      | 1 (1.79%)     |
| Esophageal                                                                  | 3 (14.3%)      | 3 (5.36%)     |
| Bladder                                                                     | 2 (9.52%)      | 0 (0%)        |
| Liver                                                                       | 2 (9.52%)      | 2 (3.57%)     |
| Breast                                                                      | 0 (0%)         | 4 (7.14%)     |
| Ovarian                                                                     | 0 (0%)         | 2 (3.57%)     |
| Head and neck                                                               | 0 (0%)         | 1 (1.79%)     |
| <b>Type of medicinal mushroom preparation used in clinical studies</b>      |                |               |
| Multi-herbal formula                                                        | 16 (76.2%)     | 1 (1.79%)     |
| Single herb                                                                 | 5 (23.8%)      | 1 (1.79%)     |
| Herbal components                                                           | 0 (0%)         | 54 (96.4%)    |
| <b>Type of medicinal mushroom preparation used in pre-clinical studies*</b> |                |               |
| Multi-herbal formula                                                        | 13 (13.1%)     | 3 (7.69%)     |
| Single herb                                                                 | 37 (37.4%)     | 0 (0%)        |
| Herbal components                                                           | 49 (49.5%)     | 39 (100%)     |
| <b>Jadad score of clinical studies</b>                                      |                |               |
| 5                                                                           | 1 (4.76%)      | 0 (0%)        |
| 4                                                                           | 1 (4.76%)      | 1 (1.79%)     |
| 3                                                                           | 5 (23.8%)      | 8 (14.3%)     |
| 2                                                                           | 3 (14.3%)      | 7 (12.5%)     |
| 1                                                                           | 10 (47.6%)     | 15 (26.8%)    |
| 0                                                                           | 1 (4.76%)      | 25 (44.6%)    |

\*The percentage in total may be more than 100% since there are multiple study types/ cancer types/ forms of medicinal mushroom used in pre-clinical studies in single literature.

**Table S3 Detailed information of the included clinical studies**

| Author (year)      | Sample size | Cancer type                                                | Treatment (chemotherapy regimen with mushrooms)                                                                                                                                                                                                                                                                                 | Control (chemotherapy-only/ mushroom-only regimen)                                                                                                                                                                              |
|--------------------|-------------|------------------------------------------------------------|---------------------------------------------------------------------------------------------------------------------------------------------------------------------------------------------------------------------------------------------------------------------------------------------------------------------------------|---------------------------------------------------------------------------------------------------------------------------------------------------------------------------------------------------------------------------------|
| <b>Lingzhi</b>     |             |                                                            |                                                                                                                                                                                                                                                                                                                                 |                                                                                                                                                                                                                                 |
| Chen et al. (2015) | 83          | Lung                                                       | Paclitaxel 135 mg/m <sup>2</sup> IV on day 1, Cisplatin 75 mg/m <sup>2</sup> IV on day 1-3/1-4 of 21-day cycle + Yang Zheng Xiao Zhi Capsule (including Lingzhi) 4 capsules PO three times daily                                                                                                                                | Paclitaxel 135 mg/m <sup>2</sup> IV on day 1, Cisplatin 75 mg/m <sup>2</sup> IV on day 1-3/1-4 of 21-day cycle                                                                                                                  |
| Hu & Gan. (2013)   | 60          | Lung                                                       | Gemcitabine 1000 mg/m <sup>2</sup> IV day 1 and 8, Cisplatin 60 mg/m <sup>2</sup> IV day 3-5 of 21-day cycle + Bailonglingsha Decoction (include Lingzhi 10 g) 200 ml PO daily                                                                                                                                                  | Gemcitabine 1000 mg/m <sup>2</sup> IV day 1 and 8, Cisplatin 60 mg/m <sup>2</sup> IV day 3-5 of 21-day cycle                                                                                                                    |
| Jing et al. (2007) | 114         | Esophageal, gastric, colon                                 | Cisplatin 30 mg/m <sup>2</sup> IV, 5-FU 500 mg/m <sup>2</sup> , Calcium folinate 100 mg IV on day 1-5 of 21-day cycle + Bai Long capsule 0.5 g 3 cap PO three times daily/ oral solution 50 ml (include Lingzhi) PO three times daily                                                                                           | Cisplatin 30 mg/m <sup>2</sup> IV, 5-FU 500 mg/m <sup>2</sup> , Calcium folinate 100 mg IV on day 1-5 of 21-day cycle                                                                                                           |
| Li & Zhang. (1998) | 56          | Lung                                                       | Cisplatin 40 mg IV, Vindesine IV + Lao Jun Xian oral solution 20ml (include Lingzhi) PO three times daily                                                                                                                                                                                                                       | Cisplatin 40 mg IV, Vindesine IV                                                                                                                                                                                                |
| Lin et al. (2004)  | 114         | Gastric, esophageal, lung, liver, colon, cervical, bladder | 5-FU 300 mg/m <sup>2</sup> IV twice weekly, Doxorubicin 30mg/m <sup>2</sup> IV weekly, Mitomycin 3 mg/m <sup>2</sup> IV bolus weekly + Lingzhi capsule 4 cap PO four times daily                                                                                                                                                | 5-FU 300 mg/m <sup>2</sup> IV twice weekly, Doxorubicin 30mg/m <sup>2</sup> IV weekly, Mitomycin 3 mg/m <sup>2</sup> IV bolus weekly                                                                                            |
| Liu (2011)         | 30          | Colorectal                                                 | Oxaliplatin 100 mg/m <sup>2</sup> IV on day 1, Leucovorin 400mg/m <sup>2</sup> IV on day 1, 5-FU 400mg/m <sup>2</sup> IV bolus on day 1, 2.4-3.0 g/m <sup>2</sup> IV for 46h + Yi Qi Yang Yin granules (include Lingzhi 30 g) PO twice daily                                                                                    | Oxaliplatin 100 mg/m <sup>2</sup> IV on day 1, Leucovorin 400mg/m <sup>2</sup> IV on day 1, 5-FU 400mg/m <sup>2</sup> IV bolus on day 1, 2.4-3.0 g/m <sup>2</sup> IV for 46h                                                    |
| Lu. (2013)         | 120         | Gastric                                                    | Paclitaxel 75 mg/m <sup>2</sup> IV, Oxaliplatin 85 mg/m <sup>2</sup> IV, Calcium folinate 200 mg/m <sup>2</sup> IV, 5-FU 400-600 mg/m <sup>2</sup> IV+ Herbal Formula (include Lingzhi 10 g) PO daily                                                                                                                           | Paclitaxel 75 mg/m <sup>2</sup> IV, Oxaliplatin 85 mg/m <sup>2</sup> IV, Calcium folinate 200 mg/m <sup>2</sup> IV, 5-FU 400-600 mg/m <sup>2</sup> IV                                                                           |
| Wang et al. (2014) | 58          | Lung                                                       | Paclitaxel 135-175 mg/m <sup>2</sup> IV on day 1, Cisplatin 20-25 mg/m <sup>2</sup> IV on day 1-3 of 21-day cycle + Cracked Lingzhi Spore powder 1 g PO three times daily                                                                                                                                                       | Paclitaxel 135-175 mg/m <sup>2</sup> IV on day 1, Cisplatin 20-25 mg/m <sup>2</sup> IV on day 1-3 of 21-day cycle                                                                                                               |
| Wang et al. (2014) | 64          | Colorectal                                                 | Oxaliplatin 100-130 mg/m <sup>2</sup> IV on day 1, Capecitabine 1000 mg/m <sup>2</sup> PO twice daily on day 1-14 of 21-day cycle + Cracked Lingzhi Spore powder 10g PO three times daily                                                                                                                                       | Oxaliplatin 100-130 mg/m <sup>2</sup> IV on day 1, Capecitabine 1000 mg/m <sup>2</sup> PO twice daily on day 1-14 of 21-day cycle                                                                                               |
| Wang et al. (2016) | 134         | Lung                                                       | Paclitaxel 135 mg/m <sup>2</sup> on day 1, Cisplatin 75 mg/m <sup>2</sup> on day 1 of 21-day cycle + Compound Lingzhi Spore capsule (Cracked Lingzhi Spore + Nu Zhen Zi) 4 g PO three times daily                                                                                                                               | Paclitaxel 135 mg/m <sup>2</sup> on day 1, Cisplatin 75 mg/m <sup>2</sup> on day 1 of 21-day cycle                                                                                                                              |
| Xie. (2016)        | 120         | Lung                                                       | Paclitaxel 175 mg/m <sup>2</sup> IV on day 1, Cisplatin 25 mg/m <sup>2</sup> IV on day 1-3 of 21-day cycle + Jia Wei Shen Qi Decoction (include Lingzhi 6 g) 400 ml PO daily                                                                                                                                                    | Paclitaxel 175 mg/m <sup>2</sup> IV on day 1, Cisplatin 25 mg/m <sup>2</sup> IV on day 1-3 of 21-day cycle                                                                                                                      |
| Xu & Zhang. (2008) | 30          | Lung                                                       | Paclitaxel 75 mg/m <sup>2</sup> IV on day 1 and 8, Cisplatin 20 mg/m <sup>2</sup> IV on day 1-3 of 28-day cycle; Gemcitabine 1 g/m <sup>2</sup> IV on day 1 and 8, Cisplatin 20 mg/m <sup>2</sup> IV on day 1-3 of 28-day cycle + Bu Xu Hua Du Formula (including Lingzhi) PO, Jin Shui Bao capsules 4 cap PO three times daily | Paclitaxel 75 mg/m <sup>2</sup> IV on day 1 and 8, Cisplatin 20 mg/m <sup>2</sup> IV on day 1-3 of 28-day cycle; Gemcitabine 1 g/m <sup>2</sup> IV on day 1 and 8, Cisplatin 20 mg/m <sup>2</sup> IV on day 1-3 of 28-day cycle |

**Table S3 Detailed information of the included clinical studies (con't)**

| Author (year)          | Sample size | Cancer type                                                | Treatment (chemotherapy regimen with mushrooms)                                                                                                                                                                                                                                                  | Control (chemotherapy-only/ mushroom-only regimen)                                                                                                                                                                                   |
|------------------------|-------------|------------------------------------------------------------|--------------------------------------------------------------------------------------------------------------------------------------------------------------------------------------------------------------------------------------------------------------------------------------------------|--------------------------------------------------------------------------------------------------------------------------------------------------------------------------------------------------------------------------------------|
| <b>Lingzhi (con't)</b> |             |                                                            |                                                                                                                                                                                                                                                                                                  |                                                                                                                                                                                                                                      |
| Xu et al. (2011)       | 121         | Lung                                                       | Cisplatin 70-80 mg/m <sup>2</sup> IV on day 1-3, Vinorelbine 25-30 mg/m <sup>2</sup> IV on day 1-8 + Kangliuzengxiao decoction (include Lingzhi 24 g) 150 ml PO twice daily during chemo, Feiyanning decoction (include Lingzhi 30 g) 150 ml PO twice daily after chemo                          | Cisplatin 70-80 mg/m <sup>2</sup> IV on day 1-3, Vinorelbine 25-30 mg/m <sup>2</sup> IV on day 1-8                                                                                                                                   |
| Yan. (2017)            | 162         | Cervical                                                   | Cisplatin 75 mg/m <sup>2</sup> IV on day 1, 5-FU 750 mg/m <sup>2</sup> IV on day 1-5 of 21-day cycle + Lingzhi capsule 0.54 g PO three times daily                                                                                                                                               | Cisplatin 75 mg/m <sup>2</sup> IV on day 1, 5-FU 750 mg/m <sup>2</sup> IV on day 1-5 of 21-day cycle                                                                                                                                 |
| Zhang & Chang. (2002)  | 71          | Lung                                                       | Mitomycin 6-8 mg/m <sup>2</sup> IV on day 1, Vincristine 3-4 mg/m <sup>2</sup> IV on day 1-8, Cisplatin 70-80 mg/m <sup>2</sup> IV on day 1 + Shen Long Jin Ling Pills (including Lingzhi) 1-2 capsules PO three times daily                                                                     | Mitomycin 6-8 mg/m <sup>2</sup> IV on day 1, Vincristine 3-4 mg/m <sup>2</sup> IV on day 1-8, Cisplatin 70-80 mg/m <sup>2</sup> IV on day 1                                                                                          |
| Zhang & Deng. (2007)   | 84          | Lung                                                       | Doxorubicin 50 mg IA, Cisplatin 60 mg IA, Mitomycin 10 mg IA + Yan Shu injection (including Lingzhi) 30ml/d IV                                                                                                                                                                                   | Doxorubicin 50 mg IA, Cisplatin 60 mg IA, Mitomycin 10 mg IA                                                                                                                                                                         |
| Zhang et al. (2006)    | 36          | Colorectal                                                 | Capecitabine 1000 mg/m <sup>2</sup> twice daily on day 1-14, Oxaliplatin 135 mg/m <sup>2</sup> IV on day 1 of 21-day cycle, + Lingzhi Capsules PO                                                                                                                                                | Capecitabine 1000 mg/m <sup>2</sup> twice daily on day 1-14, Oxaliplatin 135 mg/m <sup>2</sup> IV on day 1 of 21-day cycle                                                                                                           |
| Zhang et al. (2010)    | 60          | Lung                                                       | Paclitaxel 75 mg/m <sup>2</sup> IV on day 1 and 8, Cisplatin 20 mg/m <sup>2</sup> IV on day 1-5 of 28-day cycle; Gemcitabine 1 g/m <sup>2</sup> IV on day 1 and 8, Cisplatin 20 mg/m <sup>2</sup> IV on day 1-5 of 28-day cycle + Bu Xu Hua Du Formula (include Lingzhi) PO                      | Paclitaxel 75 mg/m <sup>2</sup> IV on day 1 and 8, Cisplatin 20 mg/m <sup>2</sup> IV on day 1-5; Gemcitabine 1 g/m <sup>2</sup> IV on day 1 and 8, Cisplatin 20 mg/m <sup>2</sup> IV on day 1-5                                      |
| Zhao & He. (2008)      | 40          | Lung                                                       | Paclitaxel 135-175 mg/m <sup>2</sup> IV on day 1, Cisplatin 25 mg/m <sup>2</sup> IV on day 2-4 of 21/28-day cycle; Gemcitabine 1 g/m <sup>2</sup> IV on day 1 and 8, Cisplatin 25 mg/m <sup>2</sup> IV on day 2-4 of 21/28-day cycle + Compound Lingzhi Spore Capsule 4 cap PO three times daily | Paclitaxel 135-175 mg/m <sup>2</sup> IV on day 1, Cisplatin 25 mg/m <sup>2</sup> IV on day 2-4 of 21/28-day cycle; Gemcitabine 1 g/m <sup>2</sup> IV on day 1 and 8, Cisplatin 25 mg/m <sup>2</sup> IV on day 2-4 of 21/28-day cycle |
| Zhao et al. (2015)     | 59          | Lung                                                       | Paclitaxel 135 mg/m <sup>2</sup> /d IV, Cisplatin 25 mg/m <sup>2</sup> /d IV + Compound Lingzhi Spore capsule (Cracked Lingzhi Spore + Nu Zhen Zi) 4 g PO three times daily                                                                                                                      | Paclitaxel 135 mg/m <sup>2</sup> /d IV, Cisplatin 25 mg/m <sup>2</sup> /d IV                                                                                                                                                         |
| Zhou. (1997)           | 104         | Gastric, esophageal, lung, liver, colon, cervical, bladder | 5-FU 300 mg/m <sup>2</sup> IV twice weekly, Doxorubicin 30 mg/m <sup>2</sup> IV weekly on week 1-4, Mitomycin 3 mg/m <sup>2</sup> IV weekly + Lao Jun Xian oral solution (include Lingzhi) 10 ml PO three times daily                                                                            | 5-FU 300 mg/m <sup>2</sup> IV twice weekly, Doxorubicin 30 mg/m <sup>2</sup> IV weekly on week 1-4, Mitomycin 3 mg/m <sup>2</sup> IV weekly                                                                                          |
| <b>Yunzhi</b>          |             |                                                            |                                                                                                                                                                                                                                                                                                  |                                                                                                                                                                                                                                      |
| Akagi & Baba (2010)    | 21          | Gastric                                                    | UFT 300 mg/d PO + PSK 3g/d PO                                                                                                                                                                                                                                                                    | UFT 300 mg/d PO                                                                                                                                                                                                                      |
| Anai et al. (1991)     | 10          | Gastric                                                    | Tegafur 600 mg PO daily + PSK 3g PO daily                                                                                                                                                                                                                                                        | N/A                                                                                                                                                                                                                                  |
| E et al. (1995)        | 60          | Lung                                                       | Mitomycin 10 mg/m <sup>2</sup> IV, Vincristine 1 mg/m <sup>2</sup> IV, Cisplatin 60-90 mg/m <sup>2</sup> IV every 3-4 weeks + PSP capsules 3 cap PO three times daily                                                                                                                            | Mitomycin 10 mg/m <sup>2</sup> IV, Vincristine 1 mg/m <sup>2</sup> IV, Cisplatin 60-90 mg/m <sup>2</sup> IV every 3-4 weeks                                                                                                          |
| Gao et al. (1999)      | 50          | Lung                                                       | Cisplatin 100 mg/m <sup>2</sup> IV, Mitomycin 6 mg/m <sup>2</sup> IV, Vindesine 5mg IV on day 1 every 4 weeks + PSP 1.2 g PO three times daily                                                                                                                                                   | Cisplatin 100 mg/m <sup>2</sup> IV, Mitomycin 6 mg/m <sup>2</sup> IV, Vindesine 5mg IV on day 1 every 4 weeks                                                                                                                        |

**Table S3 Detailed information of the included clinical studies (con't)**

| Author (year)           | Sample size | Cancer type | Treatment (chemotherapy regimen with mushrooms)                                                                                                                            | Control (chemotherapy-only/ mushroom-only regimen)                                                                                                       |
|-------------------------|-------------|-------------|----------------------------------------------------------------------------------------------------------------------------------------------------------------------------|----------------------------------------------------------------------------------------------------------------------------------------------------------|
| <b>Yunzhi (con't)</b>   |             |             |                                                                                                                                                                            |                                                                                                                                                          |
| Han et al. (2019)       | 88          | Esophageal  | Paclitaxel 175 mg/m <sup>2</sup> IV, Carboplatin (AUC=5) IV once every 4 weeks + PSP capsules 3 cap PO three times daily                                                   | Paclitaxel 175 mg/m <sup>2</sup> IV, Carboplatin (AUC=5) IV once every 4 weeks                                                                           |
| Hattori et al. (1979)   | 110         | Gastric     | Tegafur 1 g rectal for one month then 600 mg PO daily + PSK 6 g/d PO                                                                                                       | Tegafur 1 g rectal for one month then 600 mg PO daily or PSK 6 g/d PO                                                                                    |
| Hattori et al. (1990)   | 7637        | Gastric     | Tegafur 600 mg/d PO till 150 g + PSK 3 g/d PO until 750g                                                                                                                   | Tegafur 600 mg PO daily till 150 g                                                                                                                       |
| Hattori et al. (1992)   | 914         | Breast      | Mitomycin 13 mg/m <sup>2</sup> IV on operation day, Tegafur 600 mg PO daily + PSK 3g PO daily / Tamoxifen 20 mg PO daily                                                   | Mitomycin 13 mg/m <sup>2</sup> IV on operation day, Tegafur 600 mg PO daily                                                                              |
| Hsu et al. (2017)       | 918         | Gastric     | UFT PO or 5-FU IV + PSK 1 g PO three times daily                                                                                                                           | UFT PO or 5-FU IV                                                                                                                                        |
| Huang & Cai. (2000)     | 48          | Lung        | Etoposide 100mg/d IV on day 1-5, Cisplatin 60 mg/m <sup>2</sup> IV on day 3 every three weeks + PSP capsules 3 cap PO three times daily                                    | Etoposide 100mg/d IV on day 1-5, Cisplatin 60 mg/m <sup>2</sup> IV on day 3 every three weeks                                                            |
| Ishibashi et al. (2008) | 55          | Colorectal  | UFT PO, UFT/Leucovorin PO, 5-FU/Leucovorin IV + PSK PO                                                                                                                     | UFT PO, UFT/Leucovorin PO, 5-FU/Leucovorin IV                                                                                                            |
| Ito et al. (2004)       | 446         | Colorectal  | PSK 3 g PO daily + 5-FU 200 mg PO daily                                                                                                                                    | 5-FU 200 mg PO daily                                                                                                                                     |
| Kaibara et al. (1976)   | 66          | Gastric     | Mitomycin 0.4 mg/kg IA during operation + Miromycin 0.4 mg/kg IV 4 weeks post-op, then 0.2 mg/kg every 3 month, Tegafur 800 mg/d PO + PSK 3 g/d PO                         | Mitomycin 0.4 mg/kg IA during operation only                                                                                                             |
| Kano et al. (1981)      | 157         | Gastric     | Mitomycin 20 mg IV intraoperatively and 10 mg IV every 3 months, Tegafur 600 mg PO daily + PSK 3 g PO daily                                                                | Mitomycin 20 mg IV intraoperatively                                                                                                                      |
| Kano et al. (1982)      | 324         | Gastric     | Mitomycin 20 mg IV during operation + Mitomycin 10 mg IV post-op every 3 months, Tegafur 600mg/d PO + PSK 3 g/d PO                                                         | Mitomycin 20 mg IV during operation                                                                                                                      |
| Kano et al. (1983)      | 285         | Gastric     | Mitomycin 20 mg IV intraoperatively and 10 mg IV every 3 months, Tegafur 600 mg PO daily + PSK 3 g PO daily                                                                | Mitomycin 20 mg IV intraoperatively                                                                                                                      |
| Katoh. (1998)           | 15          | Lung        | Etoposide 25mg IV twice daily, Carboplatin (target AUC: 3 mg/ml·min) IV + PSK 3g daily                                                                                     | Etoposide 25mg IV twice daily, Carboplatin (target AUC: 3 mg/ml·min) IV                                                                                  |
| Kikuchi wt al. (1988)   | 77          | Ovarian     | Cisplatin 30 mg/m <sup>2</sup> /d IV on day 1, Doxorubicin 7 mg/m <sup>2</sup> /d IV on day 1-5, Cyclophosphamide 140 mg/m <sup>2</sup> /d IV on day 1-5 + PSK 3g PO daily | Cisplatin 30 mg/m <sup>2</sup> /d IV on day 1, Doxorubicin 7 mg/m <sup>2</sup> /d IV on day 1-5, Cyclophosphamide 140 mg/m <sup>2</sup> /d IV on day 1-5 |
| Kodama et al. (1982)    | 487         | Gastric     | Mitomycin 0.4mg/kg IV bolus intraoperatively, then 0.2 mg/kg every 3 months, Tegafur 600-800 mg PO daily + PSK 3 g PO daily from the 7th to 10th day post-op               | Mitomycin 0.4mg/kg IV bolus intraoperatively                                                                                                             |
| Kono et al. (2008)      | 20          | Gastric     | S-1 80 mg/m <sup>2</sup> /d PO + PSK 3g/d PO                                                                                                                               | S-1 80 mg/m <sup>2</sup> /d PO                                                                                                                           |
| Kuroda et al. (1998)    | 357         | Gastric     | Mitomycin C ± Doxorubicin, Tegafur or Tegafur only + PSK PO (total dose >180g)                                                                                             | Mitomycin C ± Doxorubicin, Tegafur or Tegafur only + PSK PO (average dose of 92.4g)                                                                      |

**Table S3 Detailed information of the included clinical studies (con't)**

| Author (year)          | Sample size | Cancer type | Treatment (chemotherapy regimen with mushrooms)                                                                                                                                                                                                                                                                                                                                                                         | Control (chemotherapy-only/ mushroom-only regimen)                                                                                                                                                                                                                                                                                                               |
|------------------------|-------------|-------------|-------------------------------------------------------------------------------------------------------------------------------------------------------------------------------------------------------------------------------------------------------------------------------------------------------------------------------------------------------------------------------------------------------------------------|------------------------------------------------------------------------------------------------------------------------------------------------------------------------------------------------------------------------------------------------------------------------------------------------------------------------------------------------------------------|
| <b>Yunzhi (con't)</b>  |             |             |                                                                                                                                                                                                                                                                                                                                                                                                                         |                                                                                                                                                                                                                                                                                                                                                                  |
| Lu et al. (2001)       | 112         | Lung        | Cyclophosphamide 600mg/m <sup>2</sup> IV, Doxorubicin 50 mg/m <sup>2</sup> IV, Cisplatin 80mg/m <sup>2</sup> IV on day 1 every 3 weeks or Etoposide 100 mg/m <sup>2</sup> IV on day 1-3, Carboplatin 300 mg/m <sup>2</sup> IV on day 1-3 every 3 weeks or Etoposide 100mg/m <sup>2</sup> IV on day 1-3, Cisplatin 80 mg/m <sup>2</sup> IV on day 1 every 3 weeks<br>+ Xiao Ji Yin (include Yunzhi) 50 ml PO twice daily | Cyclophosphamide 600mg/m <sup>2</sup> IV, Doxorubicin 50 mg/m <sup>2</sup> IV, Cisplatin 80mg/m <sup>2</sup> IV on day 1 every 3 weeks or Etoposide 100 mg/m <sup>2</sup> IV on day 1-3, Carboplatin 300 mg/m <sup>2</sup> IV on day 1-3 every 3 weeks or Etoposide 100mg/m <sup>2</sup> IV on day 1-3, Cisplatin 80 mg/m <sup>2</sup> IV on day 1 every 3 weeks |
| Maehara et al. (1984)  | 22          | Gastric     | Tegafur 400 mg IV on day 1 and 8 or 600 mg PO daily + PSK 3 g PO daily                                                                                                                                                                                                                                                                                                                                                  | N/A                                                                                                                                                                                                                                                                                                                                                              |
| Mitomi et al. (1992)   | 448         | Colorectal  | Mitomycin 6.0 mg/m <sup>2</sup> IV on day of and day after surgery, then 5-FU 200 mg/d PO + PSK 3 g/d PO                                                                                                                                                                                                                                                                                                                | Mitomycin 6.0 mg/m <sup>2</sup> IV on day of and day after surgery, then 5-FU 200 mg/d PO                                                                                                                                                                                                                                                                        |
| Miyake et al. (2018)   | 357         | Colorectal  | UFT 300 mg/m <sup>2</sup> /d PO + PSK 3 g/d PO                                                                                                                                                                                                                                                                                                                                                                          | UFT 300 mg/m <sup>2</sup> /d PO, Leucovorin 75 mg/d PO                                                                                                                                                                                                                                                                                                           |
| Mukai et al. (2003)    | 91          | Colorectal  | 5-FU 150-300 mg PO daily or UFT 300-600 mg PO daily or 5'-DFUR 400-800 mg PO daily + PSK 3 g PO daily                                                                                                                                                                                                                                                                                                                   | 5-FU 150-300 mg PO daily or UFT 300-600 mg PO daily or 5'-DFUR 400-800 mg PO daily                                                                                                                                                                                                                                                                               |
| Mukai et al. (2003)    | 61          | Colorectal  | 5-FU 150-300 mg PO daily or UFT 300-600 mg PO daily or 5'-DFUR 400-800 mg PO daily + PSK 3 g PO daily                                                                                                                                                                                                                                                                                                                   | 5-FU 150-300 mg PO daily or UFT 300-600 mg PO daily or 5'-DFUR 400-800 mg PO daily                                                                                                                                                                                                                                                                               |
| Nagao et al. (1984)    | 28          | Leukemia    | Mercaptopurine 1-2 mg/kg PO daily + Krestin 3 g PO daily                                                                                                                                                                                                                                                                                                                                                                | Mercaptopurine 1-2 mg/kg PO daily                                                                                                                                                                                                                                                                                                                                |
| Nakazato et al. (1994) | 262         | Gastric     | Mitomycin 6 mg/m <sup>2</sup> on the week before Fluorouracil and PSK, Fluorouracil 150mg PO daily alternate with PSK 3g PO daily                                                                                                                                                                                                                                                                                       | Mitomycin 6 mg/m <sup>2</sup> on the week before Fluorouracil and PSK, Fluorouracil 150mg PO daily alternate with rest                                                                                                                                                                                                                                           |
| Namikawa et al. (2015) | 190         | Gastric     | S-1 40 mg/m <sup>2</sup> PO twice daily + PSK 1 g PO three times daily                                                                                                                                                                                                                                                                                                                                                  | S-1 40 mg/m <sup>2</sup> PO twice daily                                                                                                                                                                                                                                                                                                                          |
| Niimoto et al. (1988)  | 579         | Gastric     | Tegafur 600-800 mg PO daily + PSK 3g PO daily                                                                                                                                                                                                                                                                                                                                                                           | Tegafur 600-800 mg PO daily or PSK 3g PO daily                                                                                                                                                                                                                                                                                                                   |
| Ogoshi & Isono (2009)  | 1719        | Gastric     | 5-FU 150 mg PO daily or Tegafur 600 mg PO daily or UFT 300 mg PO daily + PSK 3 g PO daily +/- Mitomycin 0.2 mg/kg IV post-op day 1                                                                                                                                                                                                                                                                                      | 5-FU 150 mg PO daily or Tegafur 600 mg PO daily or UFT 300 mg PO daily +/- Mitomycin 0.2 mg/kg IV post-op day 1 +/- PSK 3g PO daily                                                                                                                                                                                                                              |
| Ogoshi et al. (1994)   | 174         | Esophageal  | Futraful 600 mg PO daily + PSK 3 g PO daily (total dose over 3 months: >270g)                                                                                                                                                                                                                                                                                                                                           | Futraful 600 mg PO daily or PSK 3 g PO daily (total dose over 3 months: >270g)                                                                                                                                                                                                                                                                                   |
| Ogoshi et al. (1995)   | 174         | Esophageal  | Futraful 600 mg PO daily + PSK 3 g PO daily (total dose over 3 months: >270g)                                                                                                                                                                                                                                                                                                                                           | Futraful 600 mg PO daily or PSK 3 g PO daily (total dose over 3 months: >270g)                                                                                                                                                                                                                                                                                   |
| Ohwada et al. (2004)   | 205         | Colorectal  | UFT 300mg PO daily + PSK 3g PO daily                                                                                                                                                                                                                                                                                                                                                                                    | UFT 300mg PO daily                                                                                                                                                                                                                                                                                                                                               |
| Ohwada et al. (2006)   | 205         | Colorectal  | UFT 300mg PO daily + PSK 3g PO daily                                                                                                                                                                                                                                                                                                                                                                                    | UFT 300mg PO daily                                                                                                                                                                                                                                                                                                                                               |
| Sakai et al. (2008)    | 101         | Colorectal  | Oral fluoropyrimidine agents (UFT, carmofur and doxifluridine) 400-800 g/day + PSK 3 g PO daily                                                                                                                                                                                                                                                                                                                         | Oral fluoropyrimidine agents (UFT, carmofur and doxifluridine) 400-800 g/day                                                                                                                                                                                                                                                                                     |
| Sakamoto (1996).       | 262         | Gastric     | Mitomycin 18.2±0.2 mg IV, 5-FU PO + PSK PO                                                                                                                                                                                                                                                                                                                                                                              | Mitomycin 18.3±0.3 mg IV, 5-FU PO                                                                                                                                                                                                                                                                                                                                |

**Table S3 Detailed information of the included clinical studies (con't)**

| Author (year)                | Sample size | Cancer type         | Treatment (chemotherapy regimen with mushrooms)                                                                                                                                                                                                                                                         | Control (chemotherapy-only/ mushroom-only regimen)                                                                                                                                                                                                         |
|------------------------------|-------------|---------------------|---------------------------------------------------------------------------------------------------------------------------------------------------------------------------------------------------------------------------------------------------------------------------------------------------------|------------------------------------------------------------------------------------------------------------------------------------------------------------------------------------------------------------------------------------------------------------|
| <b>Yunzhi (con't)</b>        |             |                     |                                                                                                                                                                                                                                                                                                         |                                                                                                                                                                                                                                                            |
| Shi & Chen. (1996)           | 30          | Gastric             | 5-FU 0.5-0.75 mg IV x 5 days, Mitomycin 6-8 mg IV on day 1 + PSP 3 cap PO three times daily                                                                                                                                                                                                             | 5-FU 0.5-0.75 mg IV x 5 days, Mitomycin 6-8 mg IV on day 1 every month + Batilol 3 cap PO three times daily                                                                                                                                                |
| Shiu et al. (1992)           | 24          | Breast              | Vincristine 2 mg IV on day 1, Cyclophosphamide 500 mg/m <sup>2</sup> IV on day 1, 4'epidoxorubicin 70 mg/m <sup>2</sup> IV on day 1 every 3 weeks + PSP 0.4 g 3 capsules PO three times daily (1 week prior to chemotherapy and continued for 3 more weeks after the 3rd cycle of chemotherapy)         | Vincristine 2 mg IV on day 1, Cyclophosphamide 500 mg/m <sup>2</sup> IV on day 1, 4'epidoxorubicin 70 mg/m <sup>2</sup> IV on day 1 every 3 weeks                                                                                                          |
| Sugimachi et al. (1997)      | 196         | Gastric             | UFT 12 mg/kg PO daily + PSK 3g PO daily                                                                                                                                                                                                                                                                 | UFT 8 mg/kg PO daily, PSK 3g PO daily                                                                                                                                                                                                                      |
| Sugiyama. (1998)             | 11          | Gastric, Colorectal | 5-FU 250 mg/body/d IV, Cisplatin 5mg/body/d IV + PSK 3g/body/d PO                                                                                                                                                                                                                                       | 5-FU 250 mg/body/d IV, Cisplatin 5mg/body/d IV                                                                                                                                                                                                             |
| Suto et al. (1994)           | 58          | Liver               | 5-FU 100-150 mg PO daily + PSK 3g PO daily                                                                                                                                                                                                                                                              | 5-FU 100-150 mg PO daily                                                                                                                                                                                                                                   |
| Takahashi et al. (2005)      | 87          | Colorectal          | 5-FU 1000 mg/m <sup>2</sup> /24h x 2 dose IV weekly, then PSK 300 mg/day PO, alternate with 5-FU 200 mg/day                                                                                                                                                                                             | 5-FU 1000 mg/m <sup>2</sup> /24h x 2 dose IV weekly, then 5-FU 200 mg/day, alternate with no treatment                                                                                                                                                     |
| Torigoe. (1980)              | 20          | Non-cancer          | Cyclophosphamide 1 mg/kg/day PO + PSK 3 g/d PO                                                                                                                                                                                                                                                          | Cyclophosphamide 1 mg/kg/d PO ± Azathioprine 1 mg/kg/d PO                                                                                                                                                                                                  |
| Wang et al. (2009)           | 64          | Liver               | Doxorubicin 60 mg/m <sup>2</sup> IV once every 21 days (not more than 550 mg/m <sup>2</sup> ) + Yun Zhi Jun capsules 3 cap PO three times daily                                                                                                                                                         | Doxorubicin 60 mg/m <sup>2</sup> IV once every 21 days (not more than 550 mg/m <sup>2</sup> )                                                                                                                                                              |
| Xu et al. (2008)             | 53          | Colorectal          | Oxaliplatin 130 mg/m <sup>2</sup> IV, Capecitabine 2 g/m <sup>2</sup> IV on day 1-14 every 21 days + PSK capsule 6g/d PO                                                                                                                                                                                | Oxaliplatin 130 mg/m <sup>2</sup> IV, Capecitabine 2 g/m <sup>2</sup> IV on day 1-14 every 21 days                                                                                                                                                         |
| Xu et al. (2003)             | 126         | Gastric             | Mitomycin 10 mg IV on day 1, FT-207 600 mg PO daily after 2 weeks + PSK 6 capsules PO daily after 2 weeks                                                                                                                                                                                               | Mitomycin 10 mg IV on day 1, FT-207 600 mg PO daily after 2 weeks                                                                                                                                                                                          |
| Yamagiwa et al. (1981)       | 169         | Head and neck       | 5-FU 300 mg PO daily or FT-207 150-400 mg daily PO/rectal daily + PSK 3 g PO daily                                                                                                                                                                                                                      | 5-FU 300 mg PO daily or FT-207 150-400 mg daily PO/rectal daily                                                                                                                                                                                            |
| Yamashita et al. (2007)      | 202         | Colorectal          | 5-FU 200 mg PO daily + PSK 3 g PO daily                                                                                                                                                                                                                                                                 | 5-FU 200 mg PO daily                                                                                                                                                                                                                                       |
| Yan & Ji. (1998)             | 48          | Breast              | Cyclophosphamide 400 mg/m <sup>2</sup> IV, Methotrexate 30 mg/m <sup>2</sup> IV, 5-FU 500 mg/m <sup>2</sup> IV on day 1 and 8 of 4-week cycle + PSK capsules 6 cap/d PO                                                                                                                                 | Cyclophosphamide 400 mg/m <sup>2</sup> IV, Methotrexate 30 mg/m <sup>2</sup> IV, 5-FU 500 mg/m <sup>2</sup> IV on day 1 and 8 of 4-week cycle                                                                                                              |
| Yan et al. (2000)            | 40          | Ovarian, cervical   | Cisplatin 75mg/m <sup>2</sup> IP on day 1, Cyclophosphamide 6mg/kg/d IV on day 1-2, Doxorubicin 50 mg/m <sup>2</sup> IV on day 1 every 4 weeks or Mitomycin 6 mg IV on day 1 and 3, 5-FU 750 mg IV on day 1-3, Cisplatin 30 mg IV on day 1-3 every 4 weeks + PSP 0.34 g 3 capsules PO three times daily | Cisplatin 75mg/m <sup>2</sup> IP on day 1, Cyclophosphamide 6mg/kg/d IV on day 1-2, Doxorubicin 50 mg/m <sup>2</sup> IV on day 1 every 4 weeks or Mitomycin 6 mg IV on day 1 and 3, 5-FU 750 mg IV on day 1-3, Cisplatin 30 mg IV on day 1-3 every 4 weeks |
| Yoshitani & Takashima (2009) | 63          | Colorectal          | UFT 400 mg PO daily + PSK 3g PO daily                                                                                                                                                                                                                                                                   | UFT 400 mg PO daily                                                                                                                                                                                                                                        |
| Zhang. (2010)                | 32          | Gastric             | 5-FU 500 mg IV x 5 days, Doxorubicin 40 mg IV on day 1 and 3, Mitomycin 8 mg IV on day 2 and 4 + PSP capsules 0.34 g 3 cap PO three times daily                                                                                                                                                         | 5-FU 500 mg IV x 5 days, Doxorubicin 40 mg IV on day 1 and 3, Mitomycin 8 mg IV on day 2 and 4                                                                                                                                                             |



**Table S3 Detailed information of the included clinical studies (con't)**

| Author (year)         | Sample size | Cancer type | Treatment (chemotherapy regimen with mushrooms)                                                                                                                                                                                         | Control (chemotherapy-only/ mushroom-only regimen)                                                                                        |
|-----------------------|-------------|-------------|-----------------------------------------------------------------------------------------------------------------------------------------------------------------------------------------------------------------------------------------|-------------------------------------------------------------------------------------------------------------------------------------------|
| <b>Yunzhi (con't)</b> |             |             |                                                                                                                                                                                                                                         |                                                                                                                                           |
| Zhao et al. (2004)    | 35          | Breast      | Cyclophosphamide 400 mg/m <sup>2</sup> IV, Methotrexate 30 mg/m <sup>2</sup> , 5-FU 500 mg/m <sup>2</sup> IV on day 1 and 8 every 4 weeks + PSP capsule 2 cap PO three times daily or Selenium Yunzhi Granules 5 g PO three times daily | Cyclophosphamide 400 mg/m <sup>2</sup> IV, Methotrexate 30 mg/m <sup>2</sup> , 5-FU 500 mg/m <sup>2</sup> IV on day 1 and 8 every 4 weeks |
| Zhong et al. (2001)   | 60          | Gastric     | 5-FU 500-750 mg IV on day 1-5, Mitomycin 6-8mg/d on day 1 every month + PSP 1 g PO three times daily                                                                                                                                    | 5-FU 500-750 mg IV on day 1-5, Mitomycin 6-8 mg/d on day 1 every month + Batilol 150 µg PO three times daily                              |

Abbreviations: IV: intravenous, PO: oral

**Table S4 Detailed information of the included pre-clinical studies**

| Author (year)             | Cell lines/ models                                                                                                                              | Mushroom (dosage)                                                                                | Cytotoxic drugs (dosage)                                                           |
|---------------------------|-------------------------------------------------------------------------------------------------------------------------------------------------|--------------------------------------------------------------------------------------------------|------------------------------------------------------------------------------------|
| <b>Lingzhi (in-vitro)</b> |                                                                                                                                                 |                                                                                                  |                                                                                    |
| Cao & Lin. (2003)         | Murine spleen lymphocytes                                                                                                                       | Ganoderma lucidum polysaccharides (0.2-12.8 mg/L)                                                | Mitomycin, Etoposide (0.1 mg/L)                                                    |
| Chen, Ren. (2007)         | Murine S-180 sarcoma                                                                                                                            | Shuang Ling Gu Ben San                                                                           | 5-FU, Cyclophosphamide, Mitomycin                                                  |
| Cui et al. (2002)         | Chinese hamster lung cells V79/HGPRT                                                                                                            | Water extract of Ganoderma lucidum (1, 10, 50 ml/L)                                              | Mitomycin C (1 mg/L)                                                               |
| Feng et al. (2009)        | Murine colon carcinoma cells C26                                                                                                                | Lingzhi spore oil (0.5, 1.0 mg/mL)                                                               | Vincristine (0-10 $\mu$ mol/L), Paclitaxel (0-500 nmol/L)                          |
| Guo et al. (2014)         | Human bladder cancer T-24 cells                                                                                                                 | Ganoderma lucidum polysaccharides (0.125, 0.25, 0.5, 1.0, 2.0 mg/ml)                             | Cisplatin (0.0625, 0.125, 0.25, 0.5, 1.0 mg/L)                                     |
| Huang et al. (2010)       | Human urothelial carcinoma (UC) cells NTUB1; cisplatin-resistant N/P(14)                                                                        | Ling-zhi polysaccharide fraction 3 (0.1, 1, 3, 10 $\mu$ g/mL)                                    | Cisplatin (14 $\mu$ M)                                                             |
| Jiang et al. (2017)       | Human colon cancer cell lines HCT-116, SW480, HT29                                                                                              | Ganoderma lucidum polysaccharides (200 $\mu$ g/ml)                                               | 5-FU (5 $\mu$ M)                                                                   |
| Kuo et al. (2013)         | Human ovarian carcinoma cell lines SKOV-3, human melanoma cell line MDA-MB-435/HER2                                                             | Ganoderma Extracts (0.25 mg/mL)                                                                  | Paclitaxel (10 ng/mL), Cisplatin (10 g/mL)                                         |
| Lei et al. (1993)         | Murine spleen lymphocytes                                                                                                                       | Ganoderma lucidum polysaccharides (50, 100, 200 $\mu$ g/ml)                                      | Mitomycin C (0.01 $\mu$ g/ml), Cytarabine (0.01 $\mu$ g/ml), 5-FU (0.1 $\mu$ g/ml) |
| Li et al. (2008)          | ADM-resistant leukemic cell line K562/ADM                                                                                                       | Ganoderma lucidum polysaccharides (5-50 mg/L)                                                    | Doxorubicin (10 mg/L)                                                              |
| Liang et al. (2013)       | Human ovarian epithelial cancer cells HO-8910                                                                                                   | Ganoderma triterpenes (2, 20, 200 ng/mL)                                                         | Cisplatin (2.5 $\mu$ g/mL)                                                         |
| Liu et al. (2010)         | Murine spleen lymphocytes                                                                                                                       | BW (500 $\mu$ g/ mL), No. 19 (200 $\mu$ g/ mL) (extract from fruiting body of Ganoderma lucidum) | 5-FU (0.1, 0.5 $\mu$ g/ mL)                                                        |
| Liu et al. (2015)         | Human hepatocellular carcinoma and drug-resistance cell lines HepG2, HepG2/ADM and breast cancer and drug-resistance cell line MCF-7, MCF-7/ADR | Ganoderenic acid B (5, 10 $\mu$ M)                                                               | Cisplatin, Doxorubicin, Vincristine and Paclitaxel, (IC50)                         |
| Opattova et al. (2019)    | Human adherent colorectal cancer cell lines HCT116, HT29                                                                                        | Ganoderma lucidum (0.5 mg/ml)                                                                    | 5-fluorouracil (5 $\mu$ M)                                                         |
| Qu et al. (2011)          | Human ovarian cancer cells SKOV-3                                                                                                               | Ganoderma lucidum polysaccharides (IC50)                                                         | Cisplatin (IC50)                                                                   |
| Wang & Weng. (2006)       | Human liver cells HL-7702                                                                                                                       | Ganoderma lucidum extract (0.625-5 mg/mL)                                                        | Cisplatin (2.5 $\mu$ g/mL)                                                         |
| Xia. (2014)               | HER2 Overexpressing human breast cancer cells SKBR3                                                                                             | Ganoderma triterpenes (12.5-100 $\mu$ g/ml)                                                      | Paclitaxel (1-4 ng/ml)                                                             |
| Xu et al. (2009)          | Human liver cancer cell lines HepG2                                                                                                             | Ganoderma lucidum polysaccharides (1, 10, 100 $\mu$ g/ml)                                        | 5-FU (50 $\mu$ g/ml)                                                               |
| Xu et al. (2017)          | Murine myocardial cells H9C2, Human breast carcinoma cells KB, oral epidermal carcinoma cells K562 and leukemia cells MCF-7                     | Ganoderma lucidum polysaccharides (0, 3.125, 6.25, 12.5, 25 mg/L)                                | Doxorubicin (1, 2, 4, 6 $\mu$ mol/L)                                               |
| Yao et al. (2012)         | Human liver cancer cell lines HepG2                                                                                                             | Ganoderic acid A (0-100 $\mu$ M)                                                                 | Cisplatin (0-10 $\mu$ M)                                                           |

**Table S4 Detailed information of the included pre-clinical studies (con't)**

| Author (year)                     | Cell lines/ models                                                                             | Mushroom (dosage)                                                | Cytotoxic drugs (dosage)                                                                                 |
|-----------------------------------|------------------------------------------------------------------------------------------------|------------------------------------------------------------------|----------------------------------------------------------------------------------------------------------|
| <b>Lingzhi (in-vitro) (con't)</b> |                                                                                                |                                                                  |                                                                                                          |
| Yi et al. (2012)                  | Human colon carcinoma HCT-116 cells                                                            | Ganoderma lucidum polysaccharides (2.5, 5, 10 mg/mL)             | 5-FU (6.25, 12.5, 25, 50 µg/mL)                                                                          |
| Yi et al. (2012)                  | Human colon carcinoma LoVo cells                                                               | Ganoderma lucidum polysaccharides (0.313, 0.625, 1.25, 2.5 mg/L) | 5-FU (6.25, 12.5, 25, 50 µg/mL)                                                                          |
| Yue et al. (2008)                 | Human cervical carcinoma HeLa cells CCL-2 and human non-small lung carcinoma A549 cell CCL-185 | Ganoderma triterpenes (25-168.75 µg/ml)                          | Docetaxel, Cisplatin (5-15 nmol/L)                                                                       |
| Yue et al. (2008)                 | The HeLa human cervical carcinoma cell line CCL-2                                              | Ganoderma triterpenes (15, 50 µg/mL)                             | Doxorubicin (0-10 µmol/L)                                                                                |
| Zhang & Zhang. (2016)             | Human lung carcinoma A549 cells                                                                | Ganoderma lucidum polysaccharides (0.2, 0.8, 3.2 µg/mL)          | Cisplatin (0.3 µg/mL)                                                                                    |
| Zhang et al. (2016)               | Human breast cancer cells SKBR-3                                                               | Ganoderma triterpenes (12.5-25 µg/ml)                            | Paclitaxel (1-2 ng/ml)                                                                                   |
| Zhao et al. (2011)                | Human epithelial ovarian cancer cell line A2780-s, A2780-cp, OV2008 and C13*                   | Ganoderma lucidum (0.5 mg/mL)                                    | Cisplatin (0, 1, 2.5, 5, 10, 20 µM)                                                                      |
| <b>Yunzhi (in-vitro)</b>          |                                                                                                |                                                                  |                                                                                                          |
| Chan & Yeung (2006)               | Human liver cancer cell lines HepG2                                                            | PSP (0.1-10 µM)                                                  | Cyclophosphamide (10 µM)                                                                                 |
| Kinoshita et al. (2010)           | Human gastric cancer cell lines MKN28, MKN45, NUGC3, KATO III, AZ521, TMK-1                    | PSK (0-500 µg/mL)                                                | Docetaxel (1 ng/ml)                                                                                      |
| Kobayashi et al. 1994)            | Rat normal kidney fibroblasts NRK-49F and rat hepatoma H4-II-E, human ovarian cancer cells     | PSK (50 µg/0.5 ml)                                               | Cisplatin (0.1-5 µg/0.5 ml)                                                                              |
| Ma & Xue. (1999)                  | Human lymphocytes                                                                              | Compound Coriolus Capsules (10-50 mg/L)                          | Mitomycin (0.12 mg/L)                                                                                    |
| Mekata et al. (2013)              | Human gastric cancer cell lines GCIY and MKN45, human colon cancer cell lines HCT116           | PSK (0, 100, 300 µg/ml)                                          | 5-FU (0.3 µg/ml), 5'-deoxy-5-fluorouridine (3 µg/ml)                                                     |
| Rosendahl et al. (2012)           | Human pancreatic cancer cell lines BxPC-3, PANC-1, MIAPaCa-2, AsPC-1                           | PSK (50, 500 µg/ml)                                              | Gemcitabine (0-100 nM)                                                                                   |
| Umehara et al. (2009)             | Human esophageal cancer cell lines KYSE170, TE13                                               | PSK (0-1000 µg/mL)                                               | 5-FU (0, 0.1, 0.5, 1 µg/mL), Docetaxel (0, 0.001, 0.005, 0.01 µg/mL), Cisplatin (0, 0.5, 1.0, 5.0 µg/mL) |
| Wan et al. (2008)                 | Estrogen receptor-negative human breast cancer cells ZR-75-30                                  | PSP (50 µg/ml)                                                   | Doxorubicin, Etoposide and Cytarabine (5 µM)                                                             |
| Yamasaki et al. (2009)            | Human gastric adenocarcinoma cell line MK-1                                                    | PSK (0-500 µg/ml)                                                | Docetaxel (0-100 nM)                                                                                     |
| Zhang et al. (2003)               | Human pancreatic cancer cell line NOR-P1                                                       | PSK (0-500 µg/mL)                                                | Docetaxel (1 nm)                                                                                         |

**Table S4 Detailed information of the included pre-clinical studies (con't)**

| Author (year)           | Cell lines/ models                                                  | Mushroom (dosage)                                                                                                                  | Cytotoxic drugs (dosage)                                                                                                                                                              |
|-------------------------|---------------------------------------------------------------------|------------------------------------------------------------------------------------------------------------------------------------|---------------------------------------------------------------------------------------------------------------------------------------------------------------------------------------|
| <b>Lingzhi (animal)</b> |                                                                     |                                                                                                                                    |                                                                                                                                                                                       |
| Chen et al. (2005)      | Hepatoma-bearing mice                                               | Lingzhi Spore Powder (4 g/kg/d IG)                                                                                                 | Cyclophosphamide (20 mg/kg/d IG)                                                                                                                                                      |
| Chen et al. (2008)      | Sarcoma-180 bearing mice                                            | Compound Lingzhi Spore Oil (3.7, 7.4, 14.8 g/kg IG daily)                                                                          | 5-FU (100mg/kg IG daily)                                                                                                                                                              |
| Chen et al. (2009)      | Normal mice                                                         | Ganoderma lucidum polysaccharide (50, 100, 200 mg/kg IG daily from day 1-11)                                                       | Methotrexate (100 mg/kg IP on day 7-8)                                                                                                                                                |
| Chen et al. (2011)      | Normal mice                                                         | Ganoderma lucidum polysaccharides (50, 100, 200 mg/kg IG daily for 10 days)                                                        | Methotrexate (50 mg/kg IP on day 7 and 8)                                                                                                                                             |
| Cui & Liu. (2002)       | Normal mice                                                         | Aqueous extract of Ganoderma lucidum (3.3, 10, 30 ml/kg IG x 30 days)                                                              | Cyclophosphamide (40 mg/kg PO on last two days), Mitomycin (2mg/kg PO on day 17)                                                                                                      |
| Dai et al. (2010)       | Sarcoma-180 bearing mice                                            | Ganoderma lucidum, selenium-containing Ganoderma lucidum (0.2 g/kg/d IG)                                                           | Cyclophosphamide (0.075 g/kg/d IP)                                                                                                                                                    |
| Furusawa et al. (1992)  | Lewis lung carcinoma-bearing mice                                   | Water extract from fruit bodies of Ganoderma lucidum (10 mg IP daily or on alternate days)                                         | Doxorubicin (2 µg IP), Cisplatin (5 mg IP on day 1), Fluorouracil (0.3 mg IP on day 1), Thioguanine (0.1 mg IP on day 1), Methotrexate (0.2 mg IP on day 1), Imexon (2 mg IP day 1-6) |
| Gui & Wang. (1996)      | Normal mice                                                         | Ganoderma lucidum injection (4 g/kg IP daily)                                                                                      | Cisplatin (2 mg/kg IV tail vein daily)                                                                                                                                                |
| Gui et al. (1993)       | W256 tumor-bearing mice                                             | Ganoderma lucidum injection (1, 2, 4 g/kg IP daily)                                                                                | Cisplatin (2 mg/kg IV tail vein daily)                                                                                                                                                |
| Gui et al. (1998)       | W256 tumor-bearing mice                                             | Ganoderma lucidum injection (1, 2, 4 g/kg IP daily)                                                                                | Cisplatin (2 mg/kg IV tail vein daily)                                                                                                                                                |
| Gui et al. (1999)       | W256 tumor-bearing mice                                             | Ganoderma lucidum injection (1, 2, 4 g/kg IP daily)                                                                                | Cisplatin (2 mg/kg IV tail vein daily)                                                                                                                                                |
| Guo et al. (2014)       | Human bladder cancer cell line T24-bearing mice                     | Ganoderma lucidum polysaccharide (200mg/kg IG daily)                                                                               | Cisplatin (25mg/kg IP daily)                                                                                                                                                          |
| Guo et al. (2015)       | Lewis lung carcinoma 3LL-bearing mice                               | Herbal Formula (include Lingzhi 0.3 g/ml) (0.4 ml/d IG for 14 days)                                                                | Cisplatin (0.1 mg/d IP on day 1, 3, 5)                                                                                                                                                |
| Hu et al. (2003)        | Sarcoma-180 bearing, murine hepatic carcinoma H22-bearing mice, dog | Compound Ganoderma lucidum Formula (5-30 ml/kg IG daily)                                                                           | Cyclophosphamide (10, 84 mg/kg IP daily), Cisplatin (1, 3 mg/kg IV daily), Tegafur (80, 100 mg/kg IG daily)                                                                           |
| Jiang et al. (2016)     | Normal mice                                                         | Ganoderma lucidum polysaccharide (20 mg/kg IG daily for 15 days)                                                                   | Cyclophosphamide (80 mg/kg IP daily on day 13-15)                                                                                                                                     |
| Jiu et al. (2008)       | Sarcoma-180 bearing mice                                            | Zhenzhiling Granules (include Lingzhi) (0.071, 0.142, 0.284 g/10g IG daily)                                                        | Cyclophosphamide (0.03 g/kg IP daily)                                                                                                                                                 |
| Kashimoto et al. (2010) | Normal mice                                                         | Basal diet containing a water-soluble extract from the culture medium of Ganoderma lucidum (Reishi) mycelia (1.25, 2.5 or 5.0%) PO | 5-FU (250 mg/kg IV/IP, 500 mg/kg IV), UFT (1g/kg PO), Cyclophosphamide (250 mg/kg PO, 200 mg/kg IP, 150 mg/kg SC), Cisplatin (12.5,25mg/kg IP)                                        |
| Li et al. (2001)        | Sarcoma-180 bearing mice                                            | Ganoderma lucidum polysaccharide (20 mg/kg SC daily)                                                                               | Cyclophosphamide (25, 50 mg/kg IG daily)                                                                                                                                              |
| Li et al. (2011)        | Sarcoma-180 bearing mice                                            | Polysaccharide from Ganoderma (25 mg/kg PO)                                                                                        | Cyclophosphamide (20 mg/kg IP daily for 10 days)                                                                                                                                      |
| Li et al. (2011)        | Sarcoma-180 bearing mice                                            | Polysaccharide from Ganoderma (25-100 mg/kg IP daily)                                                                              | Cyclophosphamide (20 mg/kg IP daily for 10 days)                                                                                                                                      |
| Li. (2012)              | Human ovarian carcinoma cell lines SKOV-3 bearing mice              | Cracked Ganoderma lucidum spore powder (500 mg/kg IG)                                                                              | Paclitaxel (30 mg/kg/week IP)                                                                                                                                                         |
| Liu et al. (2006)       | Normal mice, hepatic carcinoma H22-bearing mice                     | Lingzhi Spore Oil (0.625, 1.25, 2.5 g/kg IG daily for 7 days)/ Polystictus Glycopeptide Capsules (1 g/kg IG daily for 7 days)      | Cyclophosphamide (100 mg/kg IP for 2 days)                                                                                                                                            |

**Table S4 Detailed information of the included pre-clinical studies (con't)**

| Author (year)                     | Cell lines/ models                                                 | Mushroom (dosage)                                                                                      | Cytotoxic drugs (dosage)                                        |
|-----------------------------------|--------------------------------------------------------------------|--------------------------------------------------------------------------------------------------------|-----------------------------------------------------------------|
| <b>Lingzhi (animal) (con't)</b>   |                                                                    |                                                                                                        |                                                                 |
| Liu et al. (2007)                 | Normal mice                                                        | Lingqihong Capsules (including Lingzhi) (0.165, 0.825, 1.65 g/kg IG for 11 days)                       | Cyclophosphamide (100 mg/kg IP on day 8-10)                     |
| Liu et al. (2008)                 | Lewis lung carcinoma-bearing mice                                  | Cornu Cervi Ganoderma Lucidum capsule (144 mg/kg IG daily)                                             | Cisplatin (3.5 mg/kg IP every three days)                       |
| Liu et al. (2011)                 | Hepatic carcinoma H22-bearing mice                                 | Two Polysaccharide Fractions from Ganoderma lucidum - BW (50mg/kg IP daily), GLB (50, 150 mg/kg daily) | 5-FU (20mg/kg IP daily for 6 days)                              |
| Liu et al. (2015)                 | Human bladder cancer cell line T24-bearing mice                    | Ganoderma lucidum polysaccharide (200 mg /kg IG daily for 18 days)                                     | Cisplatin (25 mg /kg IP daily for 5 days)                       |
| Liu et al. (2015)                 | Human bladder cancer cell line T24-bearing mice                    | Ganoderma lucidum polysaccharide (200mg/kg IG daily)                                                   | Cisplatin (25mg/kg IP daily)                                    |
| Liu et al. (2017)                 | Murine hepatic carcinoma H22-bearing mice                          | Lingzhi Spore Oil (400, 1200 mg/kg IG daily)                                                           | Cyclophosphamide (30 mg/kg IP alternate day)                    |
| Ma et al. (2011)                  | Sarcoma-180 bearing mice                                           | Selenium-containing Ganoderma lucidum mycelium (0.2 g/kg IG daily for 10 days)                         | Cyclophosphamide (0.075 g/kg IP daily for 10 days)              |
| Nonaka et al. (2005)              | Normal mice                                                        | 2.50% Ganoderma Lucidum AF diet                                                                        | Cyclophosphamide (150 mg/kg IP starting one week after AF diet) |
| Nonaka et al. (2008)              | Normal and mammary carcinoma MM46-bearing mice                     | 2.5% Ganoderma lucidum AF-containing AIN-93M diet                                                      | Cyclophosphamide (50, 150 mg/kg IP once)                        |
| Opattova et al. (2018)            | Mouse adherent colon cancer cell line CT26.WT-bearing mice         | Ganoderma lucidum (11 mg IP three times/week)                                                          | 5-FU (20 mg/kg IP three times/week)                             |
| Ouyang et al. (2016)              | Human lung carcinoma A549 cell-bearing mice                        | Ganoderma lucidum polysaccharides (50, 100, 200 mg/kg PO daily)                                        | Cisplatin (10 mg/kg IP every two days)                          |
| Pang et al. (2007)                | Murine hepatoma solidity cell HepS-bearing mice                    | Ganoderma lucidum polysaccharide (33.3, 100, 300 mg/kg PO daily for 9 days)                            | Cyclophosphamide (100 mg/kg on day 6-7)                         |
| Pillai et al. (2011)              | Normal mice                                                        | Terpenes isolated from the fruiting bodies of Ganoderma lucidum (50, 100 mg/kg PO once)                | Cisplatin (16 mg/kg IP once)                                    |
| Rajasekaran & Kalaimagal. (2012). | Wistar rats                                                        | Ganoderma lucidum (250 mg/kg PO daily)                                                                 | Doxorubicin (1.5 mg/kg IP daily)                                |
| Sha & Chan. (2018)                | Human bladder cancer cell line T24-bearing mice                    | Ganoderma lucidum polysaccharide (IG daily)                                                            | Cisplatin (5, 25 mg/kg IG daily for 5 days)                     |
| Su et al. (2018)                  | Murine 4T1-breast carcinoma-bearing mice                           | Polysaccharide from spore of Ganoderma lucidum (200-400 mg/kg/d PO)                                    | Paclitaxel (12.5 mg/kg IP twice weekly)                         |
| Sukegawa et al. (2017)            | Rous sarcoma virus-induced S1018(B10) syngeneic tumor-bearing mice | Ganoderma Lucidum Mycelia Extract (1.5 g/kg PO daily)                                                  | Cyclophosphamide (40 mg/kg IP once)                             |
| Sun & Wei. (2001)                 | Normal mice                                                        | Ganoderma lucidum spore powder suspension (20, 80, 320 mg/kg IG daily)                                 | Cyclophosphamide (40mg/kg SC daily)                             |
| Sun et al. (2007)                 | Sarcoma-180 bearing mice                                           | Ganoderma lucidum extract (20 g/kg/d IG)                                                               | Cyclophosphamide (20 mg/kg/d IG)                                |
| Tang & Wu. (2013)                 | Sarcoma-180 bearing mice                                           | Ganoderma lucidum mixture (50 mg/kg IG daily)                                                          | Cyclophosphamide (30 mg/kg IP alternate day)                    |

**Table S4 Detailed information of the included pre-clinical studies (con't)**

| Author (year)                   | Cell lines/ models                                     | Mushroom (dosage)                                                                               | Cytotoxic drugs (dosage)                                                                                    |
|---------------------------------|--------------------------------------------------------|-------------------------------------------------------------------------------------------------|-------------------------------------------------------------------------------------------------------------|
| <b>Lingzhi (animal) (con't)</b> |                                                        |                                                                                                 |                                                                                                             |
| Tang. (2000)                    | Normal mice                                            | Aqueous extract of Ganoderma lucidum (2, 10, 20 g/kg/d IG for 8 days)                           | Cyclophosphamide (30 mg/kg/ SC on day 2, 3, 5)                                                              |
| Wang & Liang. (2016)            | Human bladder cancer cell line T24-bearing mice        | Ganoderma lucidum polysaccharide (200mg/kg IG daily)                                            | Cisplatin (25mg/kg IP daily)                                                                                |
| Wang et al. (2003)              | Normal mice                                            | Ganoderma lucidum aqueous extract (5, 10, 20 g/kg IG daily for 10 days)                         | Cyclophosphamide (80 mg/kg IP daily x 3)                                                                    |
| Wang et al. (2003)              | Wistar rats                                            | Ganoderma lucidum polysaccharide (4.4, 8.8, 17.6 g/kg IP daily)                                 | Cisplatin (2 mg/kg IV tail vein daily)                                                                      |
| Wang et al. (2004)              | W256 tumor-bearing mice                                | Ganoderma lucidum polysaccharide (8.8 g/kg IP daily)                                            | Cisplatin (2 mg/kg IV tail vein daily)                                                                      |
| Wang et al. (2004)              | Wistar rats                                            | Ganoderma lucidum polysaccharide (4.4, 8.8, 17.6 g/kg IP daily)                                 | Cisplatin (2 mg/kg IV tail vein daily)                                                                      |
| Wang et al. (2005)              | Wistar rats                                            | Ganoderma lucidum extract (1, 3, 10, 30 mg/kg IP x 2)                                           | Cisplatin (3 mg/kg IP x 2)                                                                                  |
| Wang et al. (2005)              | W256 tumor-bearing mice                                | Ganoderma lucidum polysaccharide (17.6, 35.2, 52.8 g/kg IP daily)                               | Cisplatin (2 mg/kg IV tail vein daily)                                                                      |
| Watanabe et al. (2013)          | Normal mice                                            | Water soluble extract from the culture medium of Ganoderma lucidum mycelia (2.5 % (w/w) MAK PO) | 5-FU (25, 80 mg/kg IP three times at 5-day intervals)                                                       |
| Wen et al. (1997)               | Normal mice                                            | Ganoderma lucidum mixture (200 mg/kg IG daily for 11 days)                                      | Cyclophosphamide (100 mg/kg IP daily from day 4 for 7 days)                                                 |
| Wu et al. (2014)                | Ehrlich ascites carcinoma tumor-bearing mice           | Huo Li Su (include selenium-containing Lingzhi spore) (0.018g IG)                               | Cyclophosphamide (25 mg/kg IP)                                                                              |
| Wu et al. (2017)                | Ehrlich ascites carcinoma tumor-bearing mice           | Huo Li Su (include selenium-containing Lingzhi spore 0.09 g/ml) (0.2 ml IG daily)               | 5-FU (25 mg/kg IV on day 7-9), Carboplatin (36.65 mg/kg IV on day 7-9), Epirubicin (40 mg/kg IV on day 7-9) |
| Xia. (2014)                     | Human breast carcinoma cell line SKBR-3 bearing mice   | Ganoderma triterpenes (250 mg/kg PO daily for 14 days)                                          | Paclitaxel (5 mg/kg every 3 days IV x 5)                                                                    |
| Xie et al. (2013)               | Human breast cancer cell line MCF-7 -bearing mice      | Cracked Lingzhi Spore Powder (500 mg/kg IG daily for 4 weeks)                                   | Cyclophosphamide (30 mg/kg IP weekly for 4 weeks)                                                           |
| Xing & Nie. (2000)              | Normal mice                                            | Oral liquid of Ganoderma lucidum polysaccharide (150, 300 mg/kg IG daily for 10 days)           | Cyclophosphamide (50 mg/kg SC daily for 10 days)                                                            |
| Xu et al. (2017)                | Normal mice                                            | Ganoderma lucidum polysaccharide (12.5, 25, 50 µg/g IG daily)                                   | Doxorubicin (4.5 mg/kg IP alternate day)                                                                    |
| Yan & Bai. (2008)               | Normal mice                                            | Ganoderma lucidum polysaccharide (150 mg/kg IP daily)                                           | Cisplatin (3mg/kg IP daily)                                                                                 |
| Yan et al. (2009)               | Normal mice                                            | Ganoderma lucidum polysaccharide (150mg/kg IP daily)                                            | Cisplatin (3mg/kg IP daily)                                                                                 |
| Yang et al. (2015)              | Human ovarian carcinoma cell lines SKOV-3 bearing mice | Cracked Ganoderma lucidum spore extract (500 mg/kg IG daily)                                    | Paclitaxel (30 mg/kg IP once weekly)                                                                        |
| Yang. (2008)                    | Normal mice                                            | Ganoderma lucidum polysaccharide (150 mg/kg IP daily)                                           | Cisplatin (3 mg/kg IV tail vein daily)                                                                      |
| Yang. (2012)                    | Human ovarian carcinoma cell lines SKOV-3 bearing mice | Cracked Ganoderma lucidum spore powder (500 mg/kg IG)                                           | Paclitaxel (30 mg/kg/week IP)                                                                               |

**Table S4 Detailed information of the included pre-clinical studies (con't)**

| Author (year)                   | Cell lines/ models                                        | Mushroom (dosage)                                                                                                                 | Cytotoxic drugs (dosage)                                                                                                                            |
|---------------------------------|-----------------------------------------------------------|-----------------------------------------------------------------------------------------------------------------------------------|-----------------------------------------------------------------------------------------------------------------------------------------------------|
| <b>Lingzhi (animal) (con't)</b> |                                                           |                                                                                                                                   |                                                                                                                                                     |
| Yu et al. (2014)                | Normal mice                                               | Polysaccharide from Ganoderma (25, 50, 100 mg/kg IP from day 4-10)                                                                | Cyclophosphamide (80 mg/kg IP on day 1-3)                                                                                                           |
| Zhang et al. (1997)             | Normal mice                                               | Ganoderma lucidum (62.5, 125, 250, 500 mg/kg IG daily)                                                                            | Doxorubicin (3 mg/kg IP alternate day)                                                                                                              |
| Zhang et al. (2006)             | Pregnant mice                                             | Ganoderma lucidum spore solution (8 g/kg/d PO twice daily)                                                                        | All-trans retinoic acid (50 mg/kg PO once)                                                                                                          |
| Zhang et al. (2006)             | Pregnant mice                                             | Ganoderma lucidum spore solution (8 g/kg/d PO twice daily)                                                                        | All-trans retinoic acid (50 mg/kg PO once)                                                                                                          |
| Zhang et al. (2012)             | Sarcoma-180 bearing mice                                  | Compounds of Ganoderma lucidum ± Astragalus extracts (250, 500, 1000 mg/kg IG daily)                                              | Cyclophosphamide (30 mg/kg IP daily)                                                                                                                |
| Zhang et al. (2014)             | Murine hepatoma solidity cell HepS-bearing mice           | Lingzhi Spore Oil (0.67, 1.33 g/kg IG daily)                                                                                      | Cyclophosphamide (15, 30 mg/kg IG daily)                                                                                                            |
| Zhang et al. (2016)             | Human breast carcinoma cell line SKBR-3 bearing mice      | Ganoderma triterpenes (250 mg/kg PO daily for 14 days)                                                                            | Paclitaxel (5 mg/kg every 3 days IV x 5)                                                                                                            |
| Zhao et al. (2012)              | Lewis lung carcinoma-bearing mice                         | Ganoderma lucidum polysaccharide (40 mg/kg IG every two days)                                                                     | Cisplatin (2mg/kg IP every two days)                                                                                                                |
| Zhou et al. (2009)              | Hepatic carcinoma H22-bearing mice                        | Ganoderma lucidum polysaccharide (1.02 g/kg IG daily for 12 days)                                                                 | Cyclophosphamide (100 mg/kg IP on day 1 and 6)                                                                                                      |
| Zhou et al. (2013)              | Normal mice                                               | Recombinant Ganoderma lucidum immunoregulatory protein (160 µg/kg/d IP twice daily on selected days)                              | Cyclophosphamide (50, 165 mg/kg/d IP on selected days)                                                                                              |
| Zhou et al. (2015)              | Chicken immunized with Newcastle disease vaccine          | Oral liquid of Astragalus and Lucidum polysaccharides (include Ganoderma lucidum polysaccharides 0.5, 2.5, 5 mg/kg PO for 5 days) | Cyclophosphamide (80 mg/kg SC for 3 days)                                                                                                           |
| Zhu et al. (2007)               | Normal Mice                                               | Ganoderma lucidum polysaccharides (2.5, 25, 250 mg/kg IP for 7 days)                                                              | Cyclophosphamide (300 mg/kg IP once)                                                                                                                |
| Zhu et al. (2019)               | Mouse cervical carcinoma U14-bearing mice                 | Ganoderma lucidum polysaccharides (30 mg/kg IV daily)                                                                             | Cisplatin (5 mg/kg IV daily)                                                                                                                        |
| <b>Yunzhi (animal)</b>          |                                                           |                                                                                                                                   |                                                                                                                                                     |
| Chan, & Yeung. (2006)           | Sprague Dawley rats                                       | PSK (2, 4 µmol/kg/d IP)                                                                                                           | Cyclophosphamide (358 mmol/kg IV x 1 dose)                                                                                                          |
| Deng et al. (1985)              | Mice Immunized With IgG Anti-Sheep Red Blood Cells (SRBC) | PSK (25-50 mg/kg IP)                                                                                                              | Cyclophosphamide (15-100 mg/kg IH/IP), 6-mercaptopurine (100 mg/kg PO), Methotrexate (1.5 mg/kg IP), 5-FU (20, 25 mg/kg IP), Mitomycin (2 mg/kg IP) |
| Fujii et al. (1989)             | Sarcoma-180 or X5563 tumor-bearing mice                   | Krestin (50 mg/kg IP 3 times per week or 1g/kg PO daily)                                                                          | Mitomycin (1 mg/kg IP 4 times in first week, 0.25 mg/kg IP in 3rd week or 0.25 mg/kg IV 3 times on 1st and 3rd week)                                |
| Fujita et al. (1988)            | Sarcoma 180-bearing mice                                  | PSK (400 mg/kg/d PO or 100 mg/kg/d IV for 4 days)                                                                                 | Tegafur (400 mg/kg 24 hours after PSK)                                                                                                              |
| Garrido et al. (2011)           | Mouse fibrosarcoma GR9-A7-bearing mice                    | PSK (2.5 mg/week IP)                                                                                                              | Docetaxel (125 µ/week IP)                                                                                                                           |
| Guo et al. (2012)               | Human lung carcinoma A549-bearing mice                    | Coriolus versicolor polysaccharides (60 mg/kg/d IP)                                                                               | Cisplatin (40 mg/kg IP three times weekly)                                                                                                          |
| Hasegawa et al. (1989)          | Normal mice                                               | Krestin (75, 150, 300 mg/kg IP)                                                                                                   | Mitomycin (2 mg/kg IV)                                                                                                                              |

**Table S4 Detailed information of the included pre-clinical studies (con't)**

| Author (year)                  | Cell lines/ models                                                                         | Mushroom (dosage)                                                                           | Cytotoxic drugs (dosage)                                                                                               |
|--------------------------------|--------------------------------------------------------------------------------------------|---------------------------------------------------------------------------------------------|------------------------------------------------------------------------------------------------------------------------|
| <b>Yunzhi (animal) (con't)</b> |                                                                                            |                                                                                             |                                                                                                                        |
| Hosokawa et al. (1985)         | 3-methylcholanthrene induced tumor-bearing C57BL/6 Mice                                    | PSK (300 mg/kg/d for 5 days or twice weekly x 7 weeks IP)                                   | Busulfan (50mg/kg PO on the day of tumor removal followed by two further dose weekly x 3 weeks)                        |
| Iwaguchi et al. (1989)         | Plasmacytoma X5563-bearing mice                                                            | PSK (10 mg/kg IP every other day)                                                           | Mitomycin C (1 mg/kg IP every other day)                                                                               |
| Jin et al. (2008)              | Ehrlich's ascites carcinoma-bearing mice                                                   | PSP (250 mg/kg/d IG)                                                                        | Doxorubicin (5.33 mg/kg/d IP x 3 days)                                                                                 |
| Katoh & Ooshiro. (2007)        | Mouse Meth A sarcoma, mouse Lewis lung carcinoma and mouse colon 26 carcinoma-bearing mice | PSK (5, 10, 50, 100 mg/kg IP 3 times per week on day 1-28)                                  | UFT (60 mg/kg PO from day 1-9), Leucovorin (5.56-22.4 mg/kg PO from day 1-9)                                           |
| Katoh. (1998)                  | Lung cancer LC-10 tumor-bearing mice                                                       | PSK (1 g/kg PO)                                                                             | Carboplatin (10 mg/kg IV on day 1), Etoposide (30 mg/kg IV for 3 days)                                                 |
| Kinoshita et al. (2010)        | Severe-combined immunodeficient mice (CB17 SCID)                                           | PSK (50 mg/kg IP 3 times every week)                                                        | Docetaxel (0-20.0 mg/kg IV on 14 <sup>th</sup> and 21 <sup>st</sup> day)                                               |
| Li et al. (2008)               | Ehrlich ascites carcinoma-bearing mice                                                     | PSP (250 mg/kg/d IG)                                                                        | Doxorubicin (4 mg/kg/d IP x 3 days)                                                                                    |
| Li et al. (2009)               | Normal mice                                                                                | Sanghuang Yunzhi Capsule (4, 8 g/kg IG daily)                                               | Cyclophosphamide (80 mg/kg IP on day 4-6), Cisplatin (7mg/kg on day 4 IP)                                              |
| Li. (2008)                     | Ehrlich ascites carcinoma-bearing mice                                                     | PSP (250 mg/kg/d IG)                                                                        | Doxorubicin (4 mg/kg IP x 3 days)                                                                                      |
| Liu et al. (2006)              | Normal mice and murine hepatic carcinoma H22-bearing mice                                  | Lingzhi Spore Oil (0.625, 1.25, 2.5 g/kg IG), Polystictus Glycopeptide Capsules (1 g/kg IG) | Cyclophosphamide (100 mg/kg IP)                                                                                        |
| Mizushima et al. (1982)        | Fibrosarcoma-bearing rat and mice                                                          | PSK (50 mg IP on Days 3 and 4 or 6 and 7)                                                   | Cyclophosphamide (0-100 mg/kg IP on Day 5)                                                                             |
| Nie. (2009)                    | Murine hepatic carcinoma H22-bearing mice                                                  | Sanghuang Yunzhi Capsule (4, 8, 16 g/kg IG daily)                                           | 5-FU (0.03 g/kg IG daily)                                                                                              |
| Oh-hashii et al. (1978)        | Leukemia P388 cell-bearing CD2F1 mice                                                      | PSK (500 or 1000 mg/kg IP on day 2,5 or 8 (with Mitomycin) and on day 5 (with other drugs)) | Mitomycin (1 mg/kg IP), 5-FU (50 mg/kg IP), 6-mercaptopurine (100 mg/kg IP), Cyclophosphamide (12.5 mg/kg IP) on day 1 |
| Qian et al. (1997)             | Wistar rats                                                                                | PSP (2 g/kg/d PO)                                                                           | Cyclophosphamide (40 mg/kg every 2 days PO)                                                                            |
| Shen et al. (2008)             | Sarcoma-180 bearing mice                                                                   | PSP (200, 400, 800 mg/kg IG daily)                                                          | Cyclophosphamide (40 mg/kg IG or 30 mg/kg IP daily)                                                                    |
| Takenoshita et al. (1995)      | Hepatocellular carcinoma KDH-8 bearing rats                                                | PSK (1000 mg/kg PO 5 times/week)                                                            | 5-FU (12.5 mg/kg PO 5 times/week)                                                                                      |
| Tsuru et al. (1991)            | Liver metastatic tumor-bearing mice                                                        | PSK (1 g/kg/day PO daily)                                                                   | Tegafur (117, 176 mg/kg/d PO daily), 5-FU (35 mg/kg/d PO daily)                                                        |
| Ueno et al. (1994)             | B-16 melanoma-bearing mice                                                                 | PSK (1 g/kg PO daily)                                                                       | Cyclophosphamide (20 mg/kg IP on selected days)                                                                        |
| Wenner et al. (2012)           | Mouse prostate tumor (TRAMP-C2) bearing mice                                               | PSK (300 mg/kg PO daily)                                                                    | Docetaxel (5 mg/kg IP twice weekly)                                                                                    |
| Wu et al. (2015)               | Normal mice                                                                                | PSP (125 mg/kg IG daily)                                                                    | Cyclophosphamide (150 mg/kg IP on day 17 and 21)                                                                       |
| Yamasaki et al. (2009)         | Gastric adenocarcinoma MK-1-bearing mice                                                   | PSK (50 mg/kg IP 3 times every week)                                                        | Docetaxel (2.5 or 5 mg/kg IV on days 14 and 21)                                                                        |
| Zhang et al. (2013)            | Normal mice                                                                                | PSP (125 mg/kg IG daily)                                                                    | Cyclophosphamide (150 mg/kg IP on day 17 and 21)                                                                       |
| Zhang et al. (2013)            | Normal mice                                                                                | PSP (125, 500 mg/kg IG daily)                                                               | Cyclophosphamide (150 mg/kg IP on day 17 and 21)                                                                       |
| Zhu et al. (2008)              | Ehrlich ascites carcinoma-bearing mice                                                     | PSP (250 mg/kg/d IG), Tanshinone (50 mg/kg/d IG)                                            | Doxorubicin (4 mg/kg/d IP)                                                                                             |
| Zhu et al. (2008)              | Ehrlich ascites carcinoma-bearing mice                                                     | PSP (250 mg/kg/d IG), Tanshinone (50 mg/kg/d IG)                                            | Doxorubicin (4 mg/kg/d IP)                                                                                             |

Abbreviations: IG: intragstric, IP: intraperitoneal, IV: intravenous, PO: oral



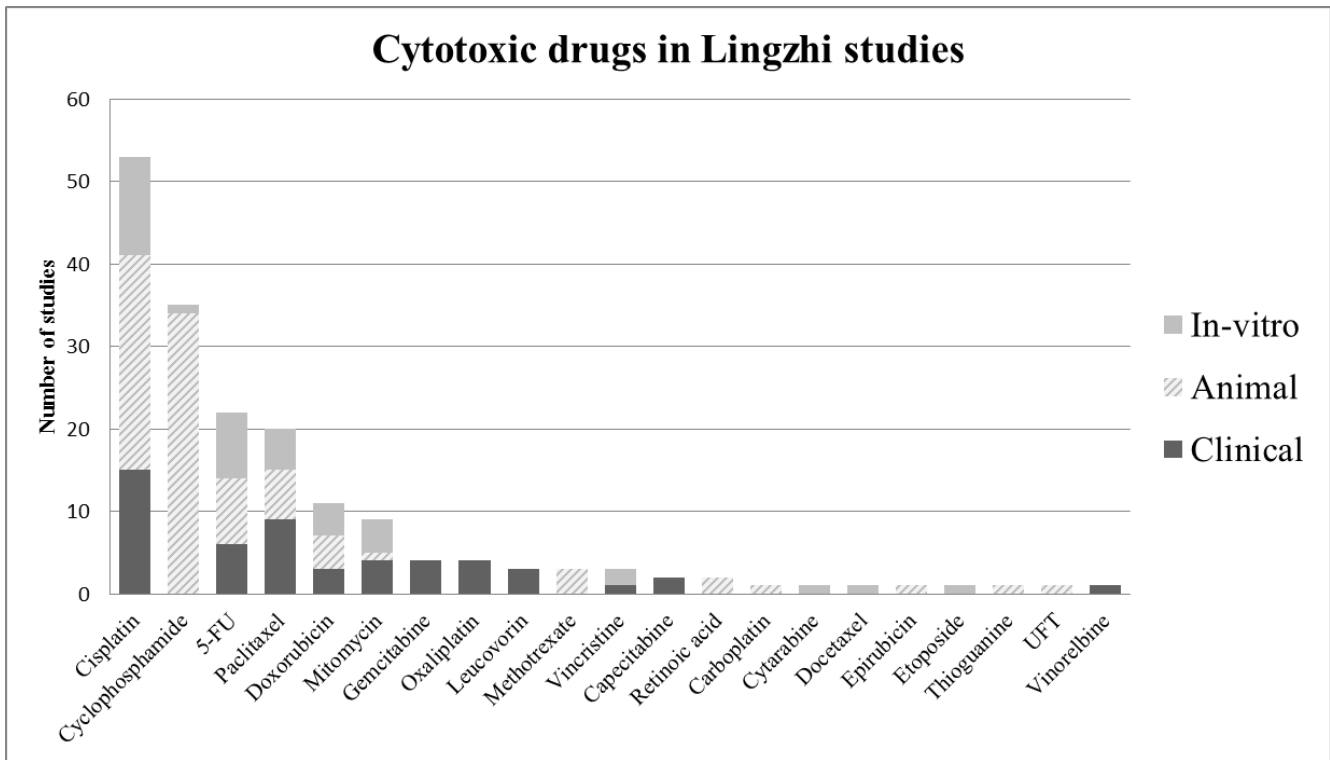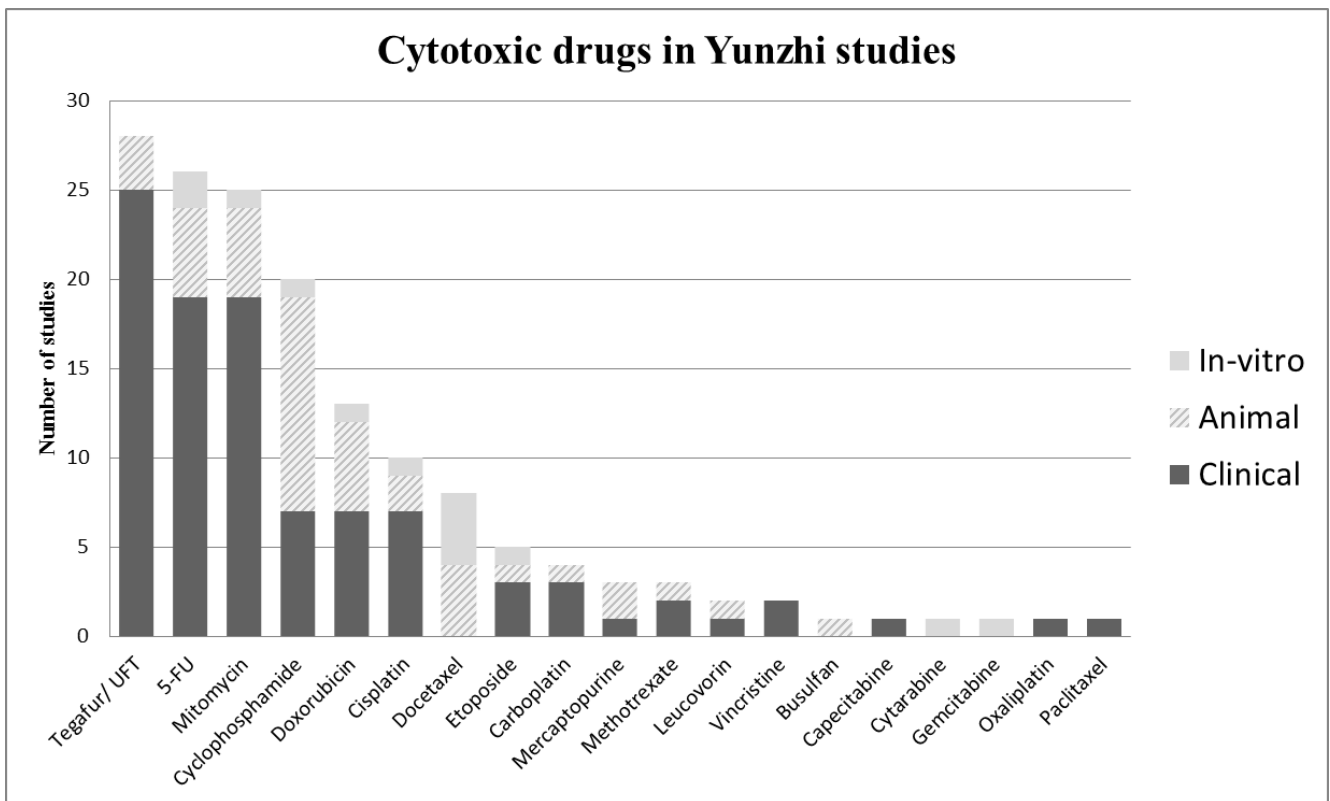

**Figure S1** Distribution of pre-clinical and clinical studies for combination use of cytotoxic drugs with Lingzhi and Yunzhi.
